# Supplementary material for: An improved clinical prediction rule for identifying neonatal bacterial meningitis: a multicenter cohort study
Source: PubMed Central journal article supplement — Transl Pediatr. 2021 Jan;10(1):64–72. doi: 10.21037/tp-20-255 (PMC7882280; doi:10.21037/tp-20-255), 2021-01
Supplement: tp-10-01-64-supplementary.pdf [file tp-10-01-64-supplementary.pdf]

**Supplemental Table 1:** Characteristics of neonatal bacterial meningitis in different regions.

| Characteristics                                           | Shanghai            | Others            | P                  |
|-----------------------------------------------------------|---------------------|-------------------|--------------------|
|                                                           | n = 63              | n = 31            |                    |
| Age, median (IQR), days                                   | 15 (8–20)           | 9 (6–18)          | 0.097 <sup>a</sup> |
| Gender                                                    |                     |                   |                    |
| Male                                                      | 31 (49.2)           | 19 (61.3)         | 0.270 <sup>p</sup> |
| Female                                                    | 32 (50.8)           | 12 (38.7)         |                    |
| Fever                                                     |                     |                   |                    |
| No                                                        | 11 (17.5)           | 5 (16.1)          | 0.872 <sup>D</sup> |
| Yes                                                       | 52 (82.5)           | 26 (83.9)         |                    |
| History of seizure before or at the time of presentation  | 16 (25.4)           | 5 (16.1)          | 0.310 <sup>D</sup> |
| Peripheral blood, median (IQR), × 10 <sup>9</sup> cells/L |                     |                   |                    |
| WBC                                                       | 11.3 (4.8–17.2)     | 8.0 (5.0– 15.3)   | 0.632 <sup>a</sup> |
| ANC                                                       | 6.5 (2.5–10.8)      | 4.7 (2.7–8.9)     | 0.702 <sup>a</sup> |
| Cerebrospinal fluid, median (IQR)                         |                     |                   |                    |
| WBC, × 10 <sup>6</sup> cells/L                            | 1080 (180–3600)     | 2572 (380–5910)   | 0.157 <sup>a</sup> |
| ANC, × 10 <sup>6</sup> cells/L                            | 863.3 (93.6–2400.0) | 1755 (234–4964.4) | 0.173 <sup>a</sup> |
| Protein, mg/L                                             | 2710 (1680–4270)    | 2762 (1652–3920)  | 0.971 <sup>a</sup> |
| Positive cerebrospinal fluid Gram stain                   | 34 (54.0)           | 16 (51.6)         | 0.830 <sup>D</sup> |
| Pathogenic bacteria                                       |                     |                   | 0.098 <sup>D</sup> |
| Group B streptococcus                                     | 37                  | 12                |                    |
| Escherichia coli                                          | 20                  | 17                |                    |
| Others                                                    | 6                   | 2                 |                    |
| Outcome                                                   |                     |                   |                    |
| Neuroimaging deficits*                                    | 26 (41.3)           | 14 (45.2)         | 0.720 <sup>D</sup> |

a Wilcoxon rank-sum test b Chisq test;\*Neuroimaging deficits including subdural effusion, ependymitis, encephalopathy, cerebral infarction,encephalomalacia, hydrocephalus, and encephalatrophy.WBC: white blood cell; ANC: absolute neutrophil count; n:number; IQR: interquartile range

**Supplemental Table 2:** The table provides data regarding the risk of bacterial meningitis in patients with 1, 2, 3 or more Bacterial Meningitis Score or refined Bacterial Meningitis Score predictors in the cohort.

| Predictors Present                                                                             | No. of neonates with CSF pleocytosis | No. (%) of neonates with bacterial meningitis |
|------------------------------------------------------------------------------------------------|--------------------------------------|-----------------------------------------------|
| <b>Bacterial Meningitis Score Predictors</b>                                                   |                                      |                                               |
| <b>1 Predictor</b>                                                                             |                                      |                                               |
| Positive CSF Gram stain                                                                        | 3                                    | 3 (100)                                       |
| CSF ANC $\geq 1000 \times 10^6$ cells/L                                                        | 0                                    | 0                                             |
| CSF protein $\geq 800$ mg/L                                                                    | 146                                  | 16 (11.0)                                     |
| Peripheral blood ANC $\geq 10 \times 10^9$ cells/L                                             | 31                                   | 0                                             |
| History of seizure before or at the time of presentation                                       | 3                                    | 0                                             |
| <b>2 Predictors</b>                                                                            |                                      |                                               |
| Positive CSF Gram stain and CSF ANC $\geq 1000 \times 10^6$ cells/L                            | 0                                    | 0                                             |
| Positive CSF Gram stain and CSF protein $\geq 800$ mg/L                                        | 11                                   | 10 (90.9)                                     |
| Positive CSF Gram stain and peripheral blood ANC $\geq 10 \times 10^9$ cells/L                 | 1                                    | 1 (100)                                       |
| Positive CSF Gram stain and seizure                                                            | 0                                    | 0                                             |
| CSF ANC $\geq 1000 \times 10^6$ cells/L and CSF protein $\geq 800$ mg/L                        | 16                                   | 9 (56.2)                                      |
| CSF ANC $\geq 1000 \times 10^6$ cells/L and peripheral blood ANC $\geq 10 \times 10^9$ cells/L | 0                                    | 0                                             |
| CSF ANC $\geq 1000 \times 10^6$ cells/L and seizure                                            | 0                                    | 0                                             |
| CSF protein $\geq 800$ mg/L and peripheral blood ANC $\geq 10 \times 10^9$ cells/L             | 106                                  | 10 (9.4)                                      |
| CSF protein $\geq 800$ mg/L and seizure                                                        | 19                                   | 3 (15.8)                                      |
| Peripheral blood ANC $\geq 10 \times 10^9$ cells/L and seizure                                 | 0                                    | 0                                             |
| <b><math>\geq 3</math> Predictors</b>                                                          |                                      |                                               |
| All Combinations                                                                               | 65                                   | 42 (64.6)                                     |
| Total patients with $\geq 1$ predictor                                                         | 401                                  | 94 (23.4)                                     |
| <b>Refined Bacterial Meningitis Score Predictors</b>                                           |                                      |                                               |
| <b>1 Predictor</b>                                                                             |                                      |                                               |
| Positive CSF Gram stain                                                                        | 3                                    | 2 (66.7)                                      |
| CSF ANC $\geq 84 \times 10^6$ cells/L                                                          | 45                                   | 7 (15.6)                                      |
| CSF protein $\geq 1650$ mg/L                                                                   | 40                                   | 8 (20.0)                                      |
| <b>2 Predictors</b>                                                                            |                                      |                                               |
| Positive CSF Gram stain and CSF ANC $\geq 84 \times 10^6$ cells/L                              | 13                                   | 13 (100)                                      |
| Positive CSF Gram stain and CSF protein $\geq 1650$ mg/L                                       | 3                                    | 3 (100)                                       |
| CSF ANC $\geq 84 \times 10^6$ cells/L and CSF protein $\geq 1650$ mg/L                         | 67                                   | 29 (43.3)                                     |
| <b>3 Predictors</b>                                                                            |                                      |                                               |
| Total patients with $\geq 1$ predictor                                                         | 205                                  | 94 (45.9)                                     |

CSF: cerebrospinal fluid; ANC: absolute neutrophil count; No: number
